# Supplementary material
Source: PubMed Central journal article supplement (PMC4396468)
Supplement: JCI78850sd.pdf [file JCI78850sd.pdf]

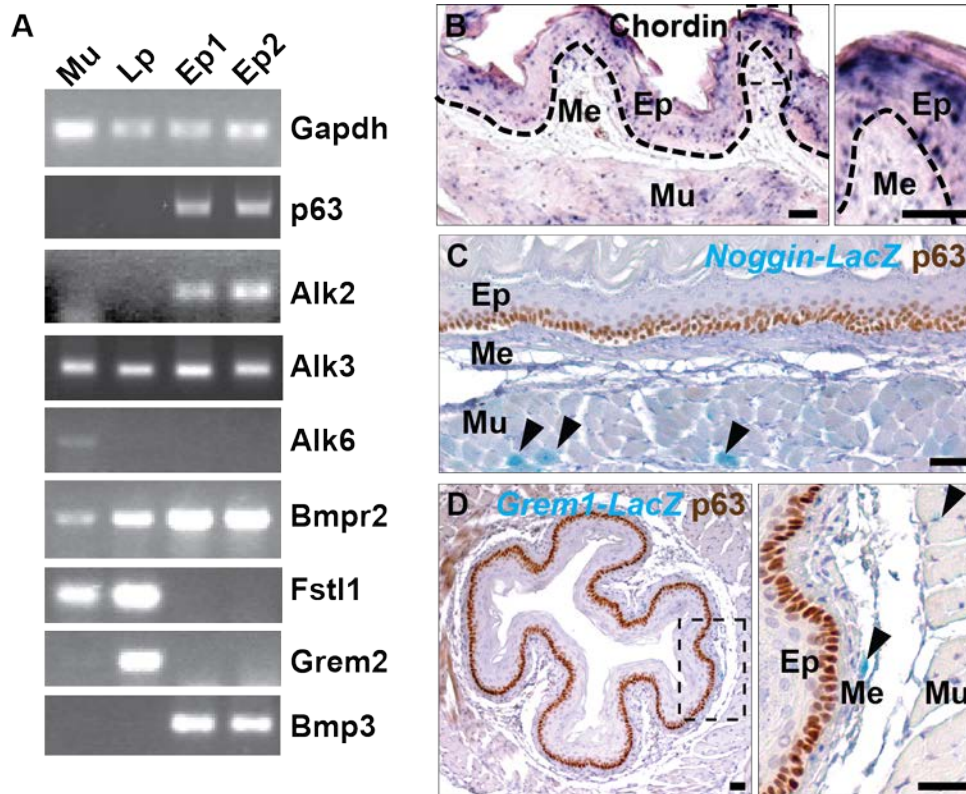

**Supplemental Fig. 1. Expression of the components of the BMP signaling pathway in the adult mouse esophagus.** (A) Expression of the transcripts for Bmps, receptors and inhibitors in different compartments of the adult esophagus. Note that p63 is used as an epithelial marker. (B) The Bmp inhibitor Chordin is enriched in the top most layers of differentiated epithelium as detected by in situ hybridization. The boxed region is shown enlarged at right. (C) *Noggin-lacZ* is expressed in a subpopulation of muscle cells (arrows). (D) *Grem1-lacZ* is expressed in a minor population of mesenchymal cells in the lamina propria and muscle cells (arrows). The boxed region is shown enlarged at right. Abbreviations: Mu, muscle; LP, lamina propria; Ep1, epithelium batch 1; Ep2, epithelium batch 2; Ep, epithelium; Me, mesenchyme. Scale bar: 50 $\mu$ m.

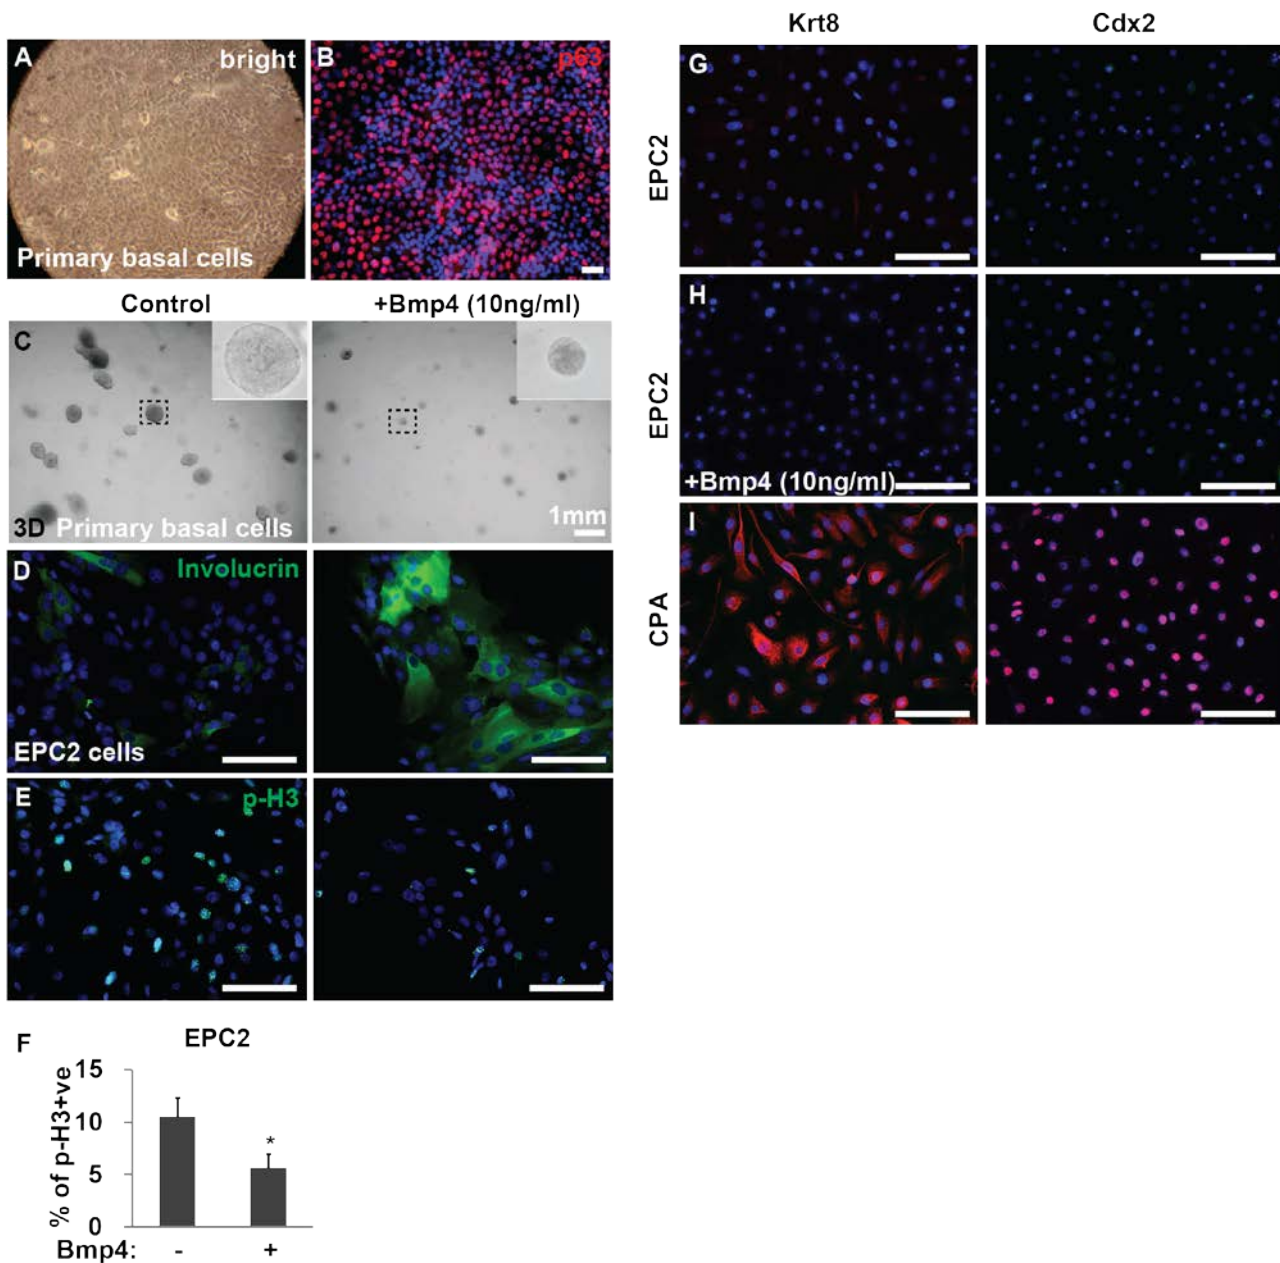

**Supplemental Fig. 2. Bmp4-treatment inhibits the proliferation and promotes the squamous differentiation of the esophageal epithelial progenitor cells.** (A-B) Primary mouse basal progenitor cells expand in vitro and maintain undifferentiated state (p63+ve). (C) Spheres formed from single mouse basal progenitor cells are smaller in the presence of Bmp4 than in PBS control. (D) Bmp4 treatment promotes the squamous differentiation of human basal cell-like EPC2 cells. (E-F) Bmp4 treatment inhibits the proliferation of EPC2 cells (n=3). (G-I) Bmp4 treatment does not promote the columnar differentiation of EPC2 cells. Note that CPA cells stained with Krt8 and Cdx2 were used as positive controls. Data are represented as mean  $\pm$  SEM. \* $P$ <0.05 by Student's t test. Scale bar: 50 $\mu$ m.

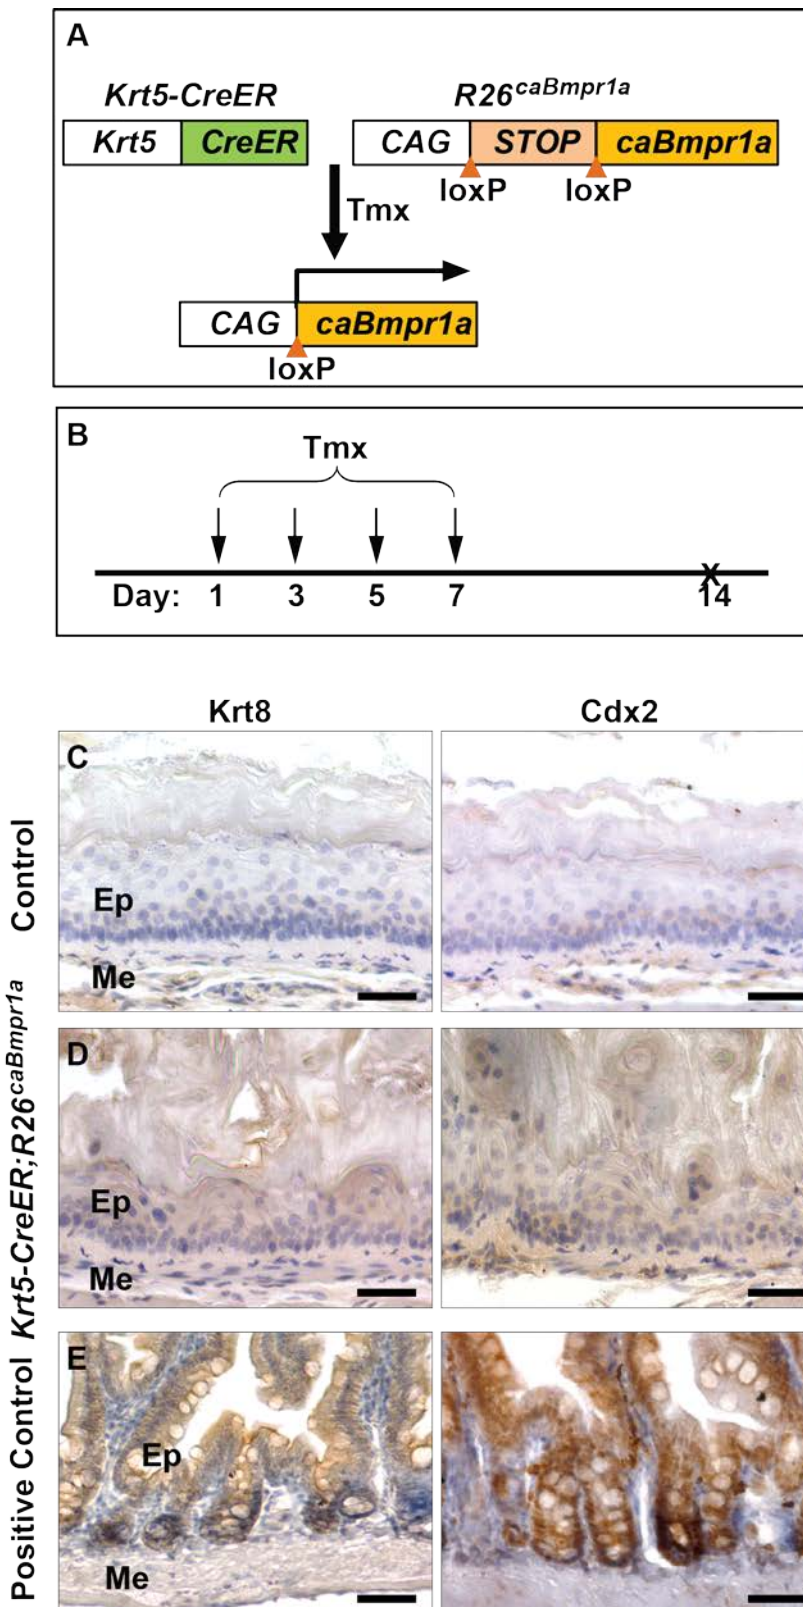

**Supplemental Fig. 3. Activation of BMP signaling does not promote the columnar differentiation of the mouse esophageal epithelium.** (A-B) Schematic illustration for conditional overexpression of constitutively active *Bmpr1a* (*caBmpr1a*). Four tamoxifen injections were performed every other day and the animals were examined one week after the final injection. (C-E) Activation of BMP signaling does not promote the columnar differentiation of the esophageal epithelium as shown by Krt8 and Cdx2 staining. Intestinal epithelial sections stained with Krt8 and Cdx2 were used as positive controls. Scale bar: 50 $\mu$ m.

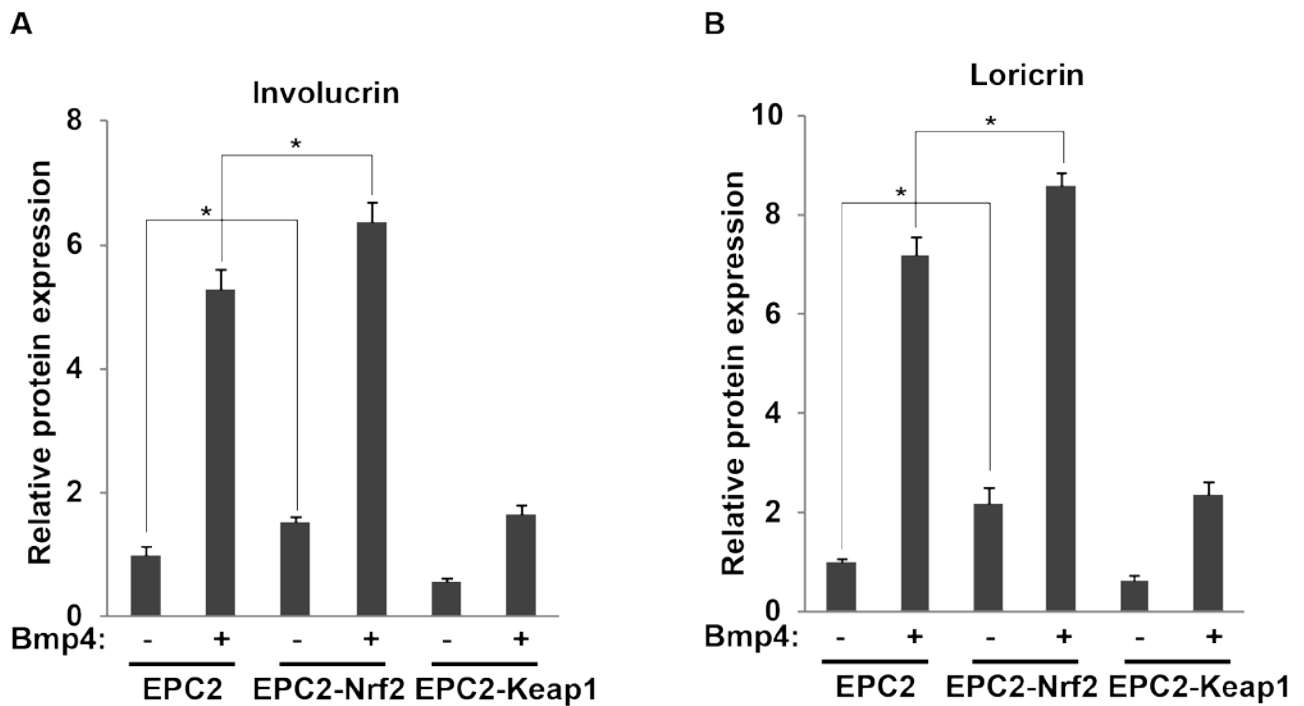

**Supplemental Fig. 4. Quantification of protein levels of Involucrin and Loricrin in response to Nrf2 or Keap1 overexpression in the presence or absence of 10ng/ml Bmp4.** Nrf2 overexpression significantly increases the protein levels of Involucrin (A) and Loricrin (B) in human EPC2 cells. In contrast, overexpression of Keap1, the inhibitor of Nrf2 maintains low levels of Involucrin (A) and Loricrin (B) in the presence of Bmp4. The quantification results were generated from three individual experiments. Data are represented as mean  $\pm$  SEM. \* $P < 0.05$  by 2-way ANOVA.



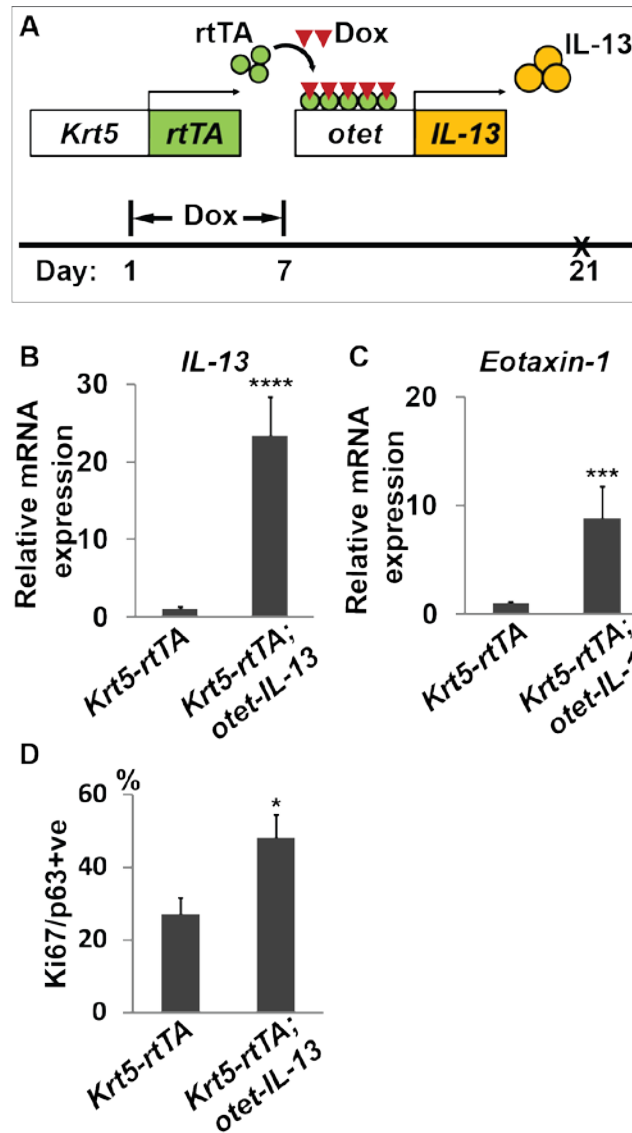

**Supplemental Fig. 5. Examination of basal cell hyperplasia in a mouse model of EoE and human EoE biopsy.** (A) Scheme for generating *Krt5-rtTA; otet-IL-13* mutants in which IL-13 is specifically expressed in basal cells upon feeding doxycycline water. (B) The transcript levels of IL-13 are increased in *Krt5-rtTA; otet-IL-13* mutants (n=5). (C) The transcript levels of Eotaxin-1, a downstream mediator of IL-13 are significantly increased in *Krt5-rtTA; otet-IL-13* mutants (n=5). (D) Proliferation of basal cells is significantly increased upon IL-13 overexpression indicated by increased Ki67+ cells (n=5). Data are represented as mean  $\pm$  SEM. \* $P < 0.05$ , \*\*\* $P < 0.001$ , \*\*\*\* $P < 0.0001$  by Student's t test.

## Supplemental Table 1

**Fold changes in the activity of 45 signaling pathways included in the Signal Finder 45-pathway Reporter Array.**

| Signaling pathway      | Transcription factor | Fold change (Log <sub>2</sub> ) |
|------------------------|----------------------|---------------------------------|
| Vitamin D              | VDR                  | 3.57*                           |
| KLF4                   | KLF4                 | 3.41*                           |
| SP1                    | SP1                  | 2.11*                           |
| Antioxidant response   | NRF2                 | 1.88*                           |
| MEF2                   | MEF2                 | 1.75*                           |
| Amino Acid Deprivation | ATF2/3/4             | 1.64*                           |
| Retinoic Acid          | RAR                  | 1.28*                           |
| Type Interferon        | STAT1/2              | 1.20*                           |
| NOTCH                  | RBP-Jk               | 1.18*                           |
| MAPK/ERK               | SRF/EIk-1            | 1.14*                           |
| Interferon Regulation  | IRF1                 | 1.13*                           |
| Glucocorticoid         | GR                   | 0.91*                           |
| HNF4                   | HNF4                 | 0.58                            |
| STAT3                  | STAT3                | 0.56                            |
| GATA                   | GATA                 | 0.39                            |
| ER Stress              | CBF/NF-Y/YY1         | 0.35                            |
| Myc                    | c-Myc                | 0.35                            |
| Wnt                    | TCF/LEF              | 0.33                            |
| NFkB                   | NFkB                 | 0.24                            |
| Sox2                   | Sox2                 | 0.21                            |
| Retinoid X             | RXR                  | 0.09                            |
| Cell Cycle             | E2F                  | 0.09                            |
| Pax6                   | Pax6                 | 0.01                            |
| ATF6                   | ATF6                 | 0.01                            |
| Heavy Metal            | MTF-1                | -0.01                           |
| Liver X                | LXR                  | -0.05                           |
| cAMP/PKA               | CREB                 | -0.05                           |
| Androgen               | AR                   | -0.12                           |
| Heat Shock             | HSF-1                | -0.16                           |
| Interferon Gamma       | STAT1                | -0.18                           |
| MAPK/Jnk               | AP-1                 | -0.28                           |
| TGFbeta                | SMAD2/3/4            | -0.30                           |
| Xenobiotic             | AhR                  | -0.42                           |
| EGR1                   | EGR1                 | -0.75*                          |
| DNA Damage             | p53                  | -0.82*                          |
| Hypoxia                | HIF-1a               | -1.06*                          |
| PI3K/Akt               | FOXO                 | -1.12*                          |
| PKC/Ca <sup>++</sup>   | NFAT                 | -1.12*                          |
| Estrogen               | ER                   | -1.22*                          |
| Nanog                  | Nanog                | -1.26*                          |

|              |       |        |
|--------------|-------|--------|
| PPAR         | PPAR  | -1.38* |
| Oct4         | Oct4  | -1.40* |
| C/EBP        | C/EBP | -1.45* |
| Progesterone | PR    | -1.54* |
| Hedgehog     | Gli   | -1.72* |

\*Statistically significant:  $P < 0.05$ ,  $n=3$ .

## Supplemental Table 2

### Primer sets used for regular and real-time RT-PCR.

| <b>Reverse Transcriptional PCR Primers:</b> |                           |
|---------------------------------------------|---------------------------|
| Mouse p63 Forward                           | GTCAGCCACCTGGACGTATT      |
| Mouse p63 Reverse                           | ACCTGTGGTGGCTCATAAGG      |
| Mouse Alk2 Forward                          | CCAGAGGAACAAAGGAGCTG      |
| Mouse Alk2 Reverse                          | AGCTGTACCTTCTCCCAGCA      |
| Mouse Alk3 Forward                          | AGGTCAAAGCTGTTCGGAGA      |
| Mouse Alk3 Reverse                          | CTGTACACGGCCCTTTGAAT      |
| Mouse Alk6 Forward                          | GTA CTGCAGGGCCACAATTT     |
| Mouse Alk6 Reverse                          | TCTTCCAGGCTCAGGTGACT      |
| Mouse Bmpr2 Forward                         | GGGAGCACGTGTTATGGTCT      |
| Mouse Bmpr2 Reverse                         | CAGAACTGATGCCAAAGCA       |
| Mouse Bmp3 Forward                          | TGCTGTGGCTCTATGACAGG      |
| Mouse Bmp3 Reverse                          | CTCTGAGTGTGATGGGAGCA      |
| Mouse Fstl1 Forward                         | CCTGTGTGTGGCAGTAATGG      |
| Mouse Fstl1 Reverse                         | TGGTGATGTTGATGGCTGTT      |
| Mouse Grem2 Forward                         | CCTGTCATTCACAGAGAGGA      |
| Mouse Grem2 Reverse                         | CATTCGAGCTCTACGATGAC      |
| Mouse Gapdh Forward                         | TGTTCTACCCCAATGTGT        |
| Mouse Gapdh Reverse                         | TGTGAGGGAGATGCTCAGTG      |
| <b>Real-Time PCR Primers:</b>               |                           |
| Human NRF2 Forward                          | CAAAGGAGCAAGAGAAAGCC      |
| Human NRF2 Reverse                          | TCTGATTTGGGAATGTGGGC      |
| Human NQO1 Forward                          | TCACCGAGAGCCTAGTTCC       |
| Human NQO1 Reverse                          | TCATGGCATAGTTGAAGGACG     |
| Human Involucrin Forward                    | TCCAAGACATTC AACCAGCC     |
| Human Involucrin Reverse                    | CTTGTATGAGACGATCTGAGGG    |
| Human $\beta$ -Actin Forward                | GCTCGTCGTCGACAACGGCTC     |
| Human $\beta$ -Actin Reverse                | CAAACATGATCTGGGTCATCTTCTC |
| Human IL-13 Forward                         | CATTGCTCTCACTTGCCTTG      |
| Human IL-13 Reverse                         | TGATGCTCCATACCATGCTG      |
| Human Eotaxin-3 Forward                     | GAGTGACATATCCAAGACCTGC    |
| Human Eotaxin-3 Reverse                     | GGGTACAGACTTTCTTGCCTC     |
| Human Follistatin Forward                   | GAAGTCCAGTACCAAGGCAG      |
| Human Follistatin Reverse                   | TGGGCAAATCCGATTACAGG      |
| Human NOX2 Forward                          | CCAGTGAAGATGTGTT CAGCT    |
| Human NOX2 Reverse                          | GCACAGCCAGTAGAAGTAGAT     |
| Human NOX4 Forward                          | TCACAGAAGGTTCCAAGCAG      |
| Human NOX4 Reverse                          | ACTGAGAAGTTGAGGGCATT C    |
| Human NOX5 Forward                          | TGTT CATCTGCTCCAGTTCC     |
| Human NOX5 Reverse                          | ACAAGATTCCAGGCACCAG       |
| Human GCLC Forward                          | GGCACAAGGACGTTCTCAAGT     |
| Human GCLC Reverse                          | CAGACAGGACCAACCGGAC       |



|                           |                            |
|---------------------------|----------------------------|
| Human GSTP1 Forward       | TGCTAGAGATGACTCGGAAGG      |
| Human GSTP1 Reverse       | TGCTAGAGATGACTCGGAAGG      |
| Mouse IL-13 Forward       | CAGCTCCCTGGTTCTCTCAC       |
| Mouse IL-13 Reverse       | CCACACTCCATACCATGCTG       |
| Mouse Eotaxin-1 Forward   | CCCAACACACTACTGAAGAGCTACAA |
| Mouse Eotaxin-1 Reverse   | TTTGCCCAACCTGGTCTTG        |
| Mouse Follistatin Forward | AGAGGTCGCTGCTCTCTCTG       |
| Mouse Follistatin Reverse | AGCTTCCTTCATGGCACACT       |
| Mouse Nrf2 Forward        | TCCCATTTGTAGATGACCATGAG    |
| Mouse Nrf2 Reverse        | CCATGTCCTGCTCTATGCTG       |
| Mouse Nqo1 Forward        | AGGATGGGAGGTAATCGAATC      |
| Mouse Nqo1 Reverse        | TGCTAGAGATGACTCGGAAGG      |
| Mouse Involucrin Forward  | AATTGGAGAACCGGACACAG       |
| Mouse Involucrin Reverse  | GTTTTGGCTTCACTGCACTTC      |
| Mouse Loricrin Forward    | ACATCAGCATCACCTCCTTC       |
| Mouse Loricrin Reverse    | TCTTTCCACAACCCACAGG        |
| Mouse Gclc Forward        | CTACCACGCAGTCAAGGACC       |
| Mouse Gclc Reverse        | CCTCCATTCAGTAACAACCTGGAC   |
| Mouse Gstp1 Forward       | ATGCCACCATACACCATTGTC      |
| Mouse Gstp1 Reverse       | GGGAGCTGCCCATACAGAC        |
